# Supplementary material
Source: PubMed Central journal article supplement (PMC4187741)
Supplement: JCM.01189-14_zjm999093725so1.pdf [file JCM.01189-14_zjm999093725so1.pdf]

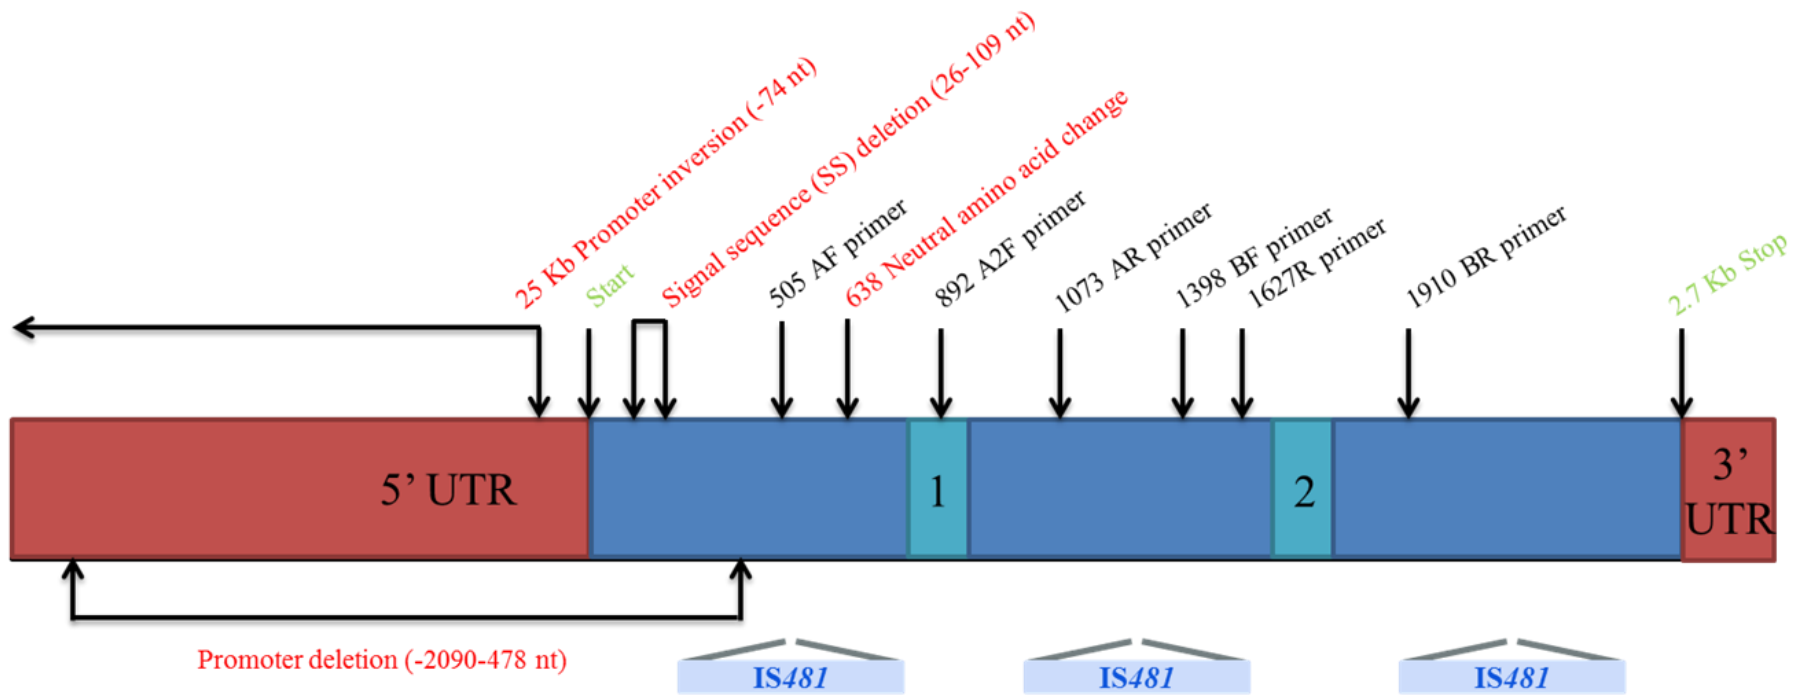

**Figure S1:** Diagram of the pertactin (*prn*) gene in *B. pertussis*. *prn* is a 2.7 Kb gene with a 5'-untranslated region (UTR) extending ~2 Kb upstream of the start codon. Two regions known to demonstrate high allelic variations due to the presence of amino-acid repeats are indicated as, region 1 and region 2. Primers used in this study, indicated in black text, are represented by name and nucleotide location. *prn* mutations identified in this study, along with their nucleotide positions, are denoted in red text. The stop codon at 2.7 Kb is indicated in green text. The 3 relative locations of IS481 insertions found in *prn* are indicated below the gene. Note: this diagram is not drawn to scale.
