# Supplementary material
Source: PubMed Central journal article supplement (PMC4187741)
Supplement: JCM.01189-14_zjm999093725so2.pdf [file JCM.01189-14_zjm999093725so2.pdf]

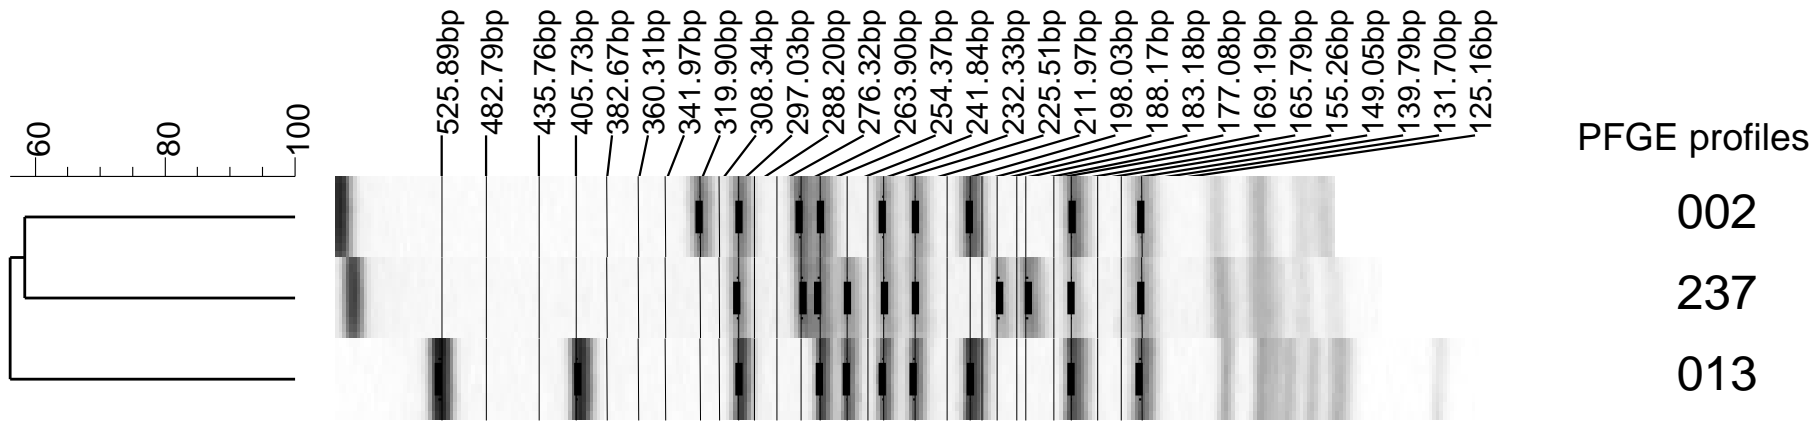

**Figure S2:** PFGE banding patterns of the three most common PFGE profiles in the Washington State 2012 pertussis epidemic. Sizing standard (in basepairs, bp) is labeled above the image, while PFGE profile is indicated to the right of the banding pattern. Dendrogram (far left) was created using UPGMA with 1% band tolerance and optimization settings.
